# Supplementary material
Source: Springer Nature journal article supplement (https://www.springermedizin.de/resource/supplementary/12905_2009_163_MOESM4_ESM.pdf/9519216)
Supplement: MOESM4 [file 9519216]

## **Discordant findings on urodynamic investigation**

- Stress incontinence is not demonstrable
- Detrusor overactivity
- Hypocontractility of the bladder
- Poor flow
- Residual urine
- Outflow obstruction
- Small cystometric capacity
- Raised sensibility of the bladder
- Lowered sensibility of the bladder
- Low level of compliance
